# Supplementary material for: PEG–SO3H catalyzed, environmentally benign synthesis of 14-aryl-14H-dibenzo[a,j]xanthenes under solvent-free conditions
Source: Royal Society of Chemistry journal article supplement (doi:10.1039/c1cy00407g), 2011-11-14
Supplement: c1cy00407g.pdf [file c1cy00407g.pdf]

*Supplementary Data*

**PEG-SO<sub>3</sub>H catalyzed, environmentally benign synthesis of 14-aryl-14H-dibenzo[*a,j*]xanthenes under solvent-free conditions†**

Davinder Prasad and Mahendra Nath\*

*Department of Chemistry, University of Delhi, Delhi 110 007, India*

\*Email: [mnath@chemistry.du.ac.in](mailto:mnath@chemistry.du.ac.in)

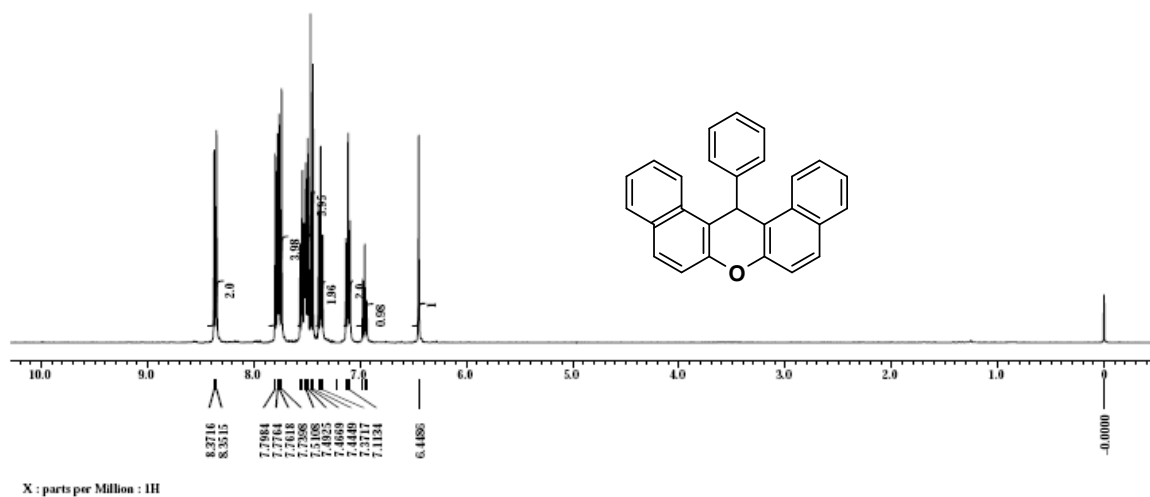

Fig 1.  $^1\text{H}$  NMR of 14-phenyl-14*H*-dibenzo[*a,j*]xanthene (3a).

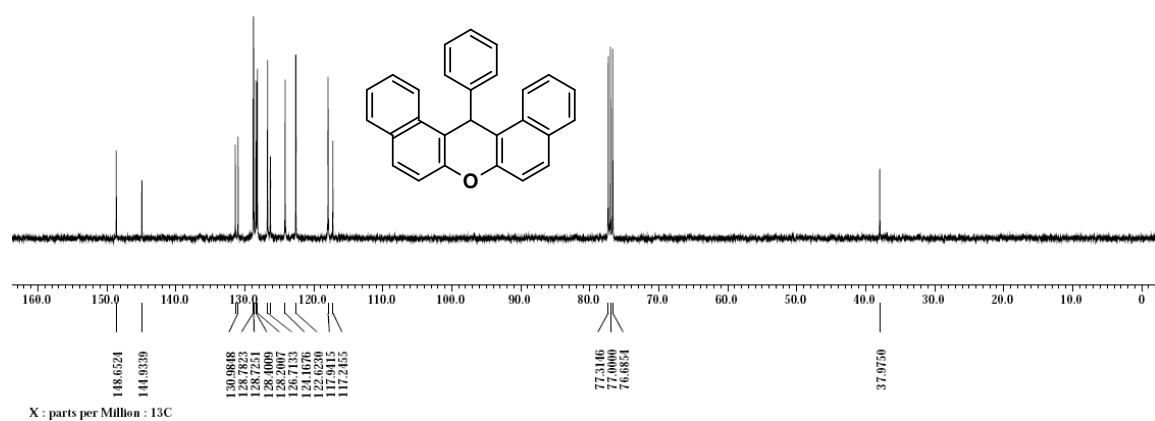

Fig 2.  $^{13}\text{C}$  NMR of 14-phenyl-14*H*-dibenzo[*a,j*]xanthene (3a).

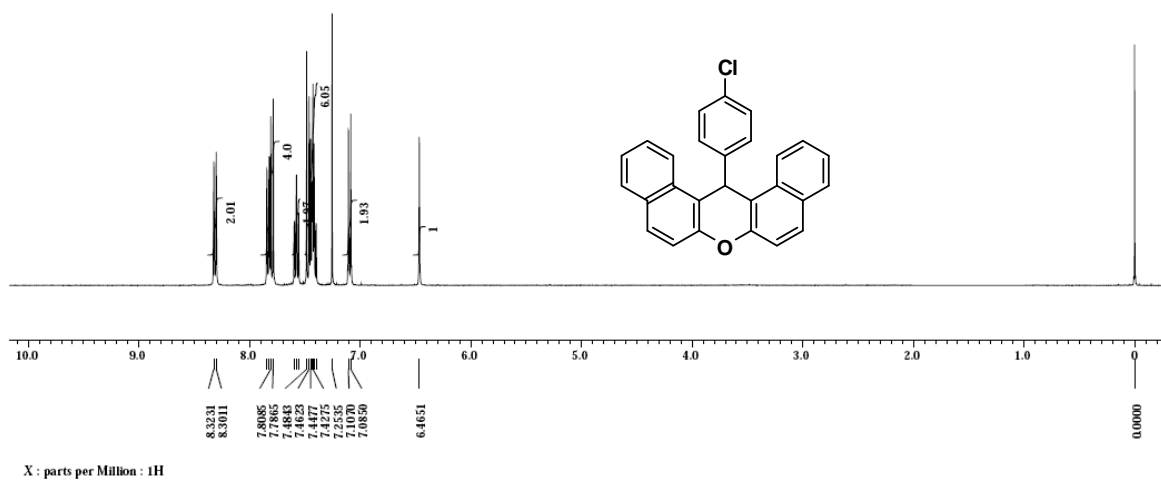

**Fig 3.** <sup>1</sup>H NMR of 14-(4-chlorophenyl)-14H-dibenzo[*a,j*]xanthene (3b).

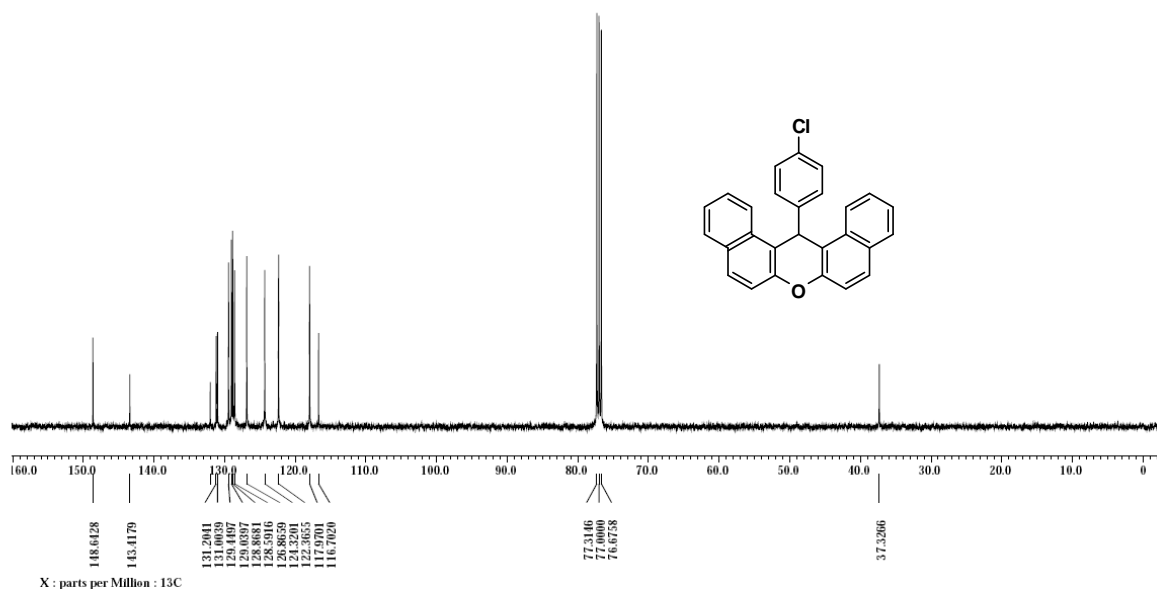

**Fig 4.** <sup>13</sup>C NMR of 14-(4-chlorophenyl)-14H-dibenzo[*a,j*]xanthene (3b).

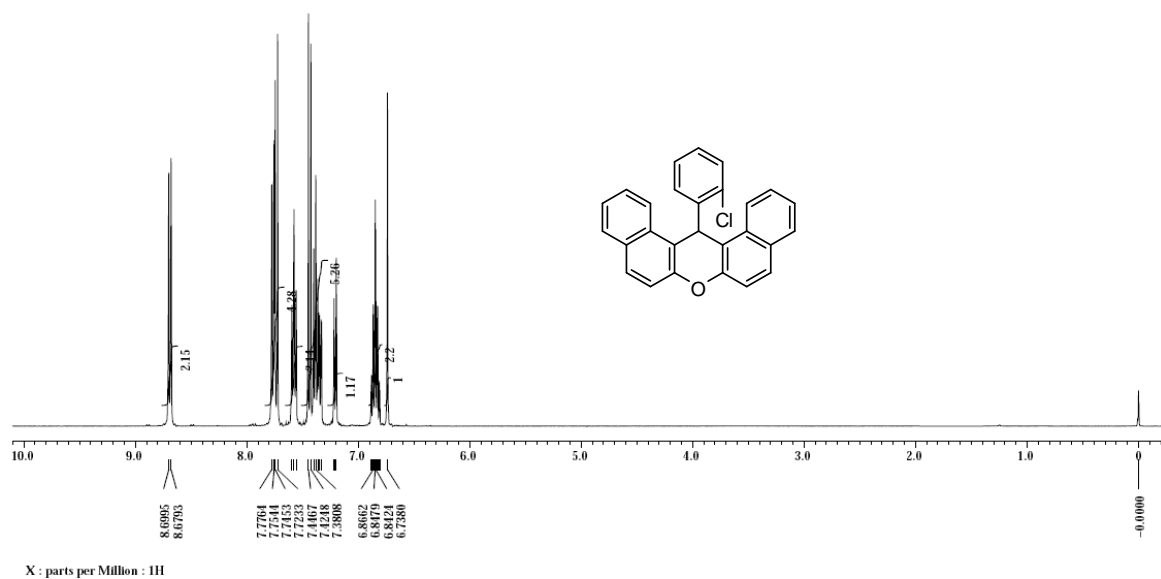

Fig 5. <sup>1</sup>H NMR of 14-(2-chlorophenyl)-14H-dibenzo[*a,j*]xanthene (3c).

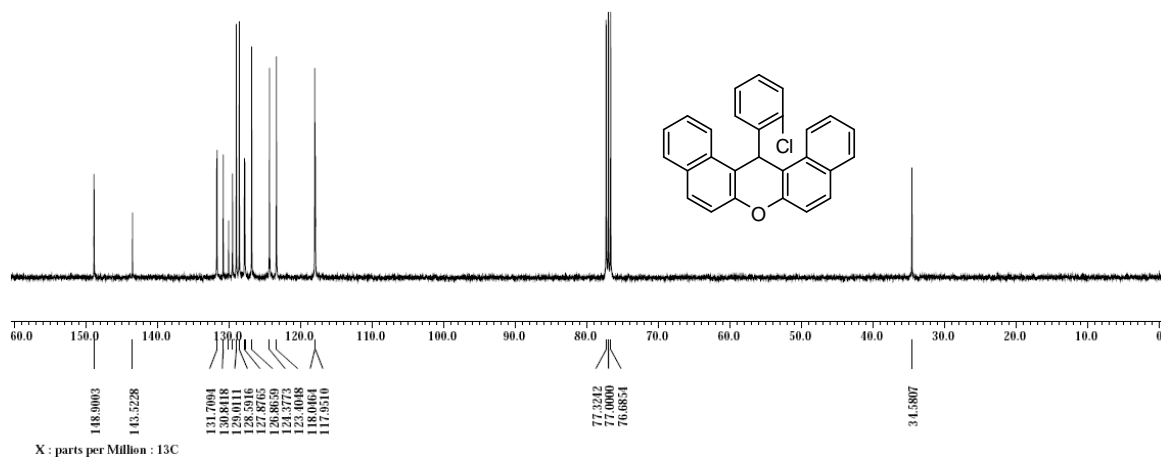

Fig 6. <sup>13</sup>C NMR of 14-(2-chlorophenyl)-14H-dibenzo[*a,j*]xanthene (3c).

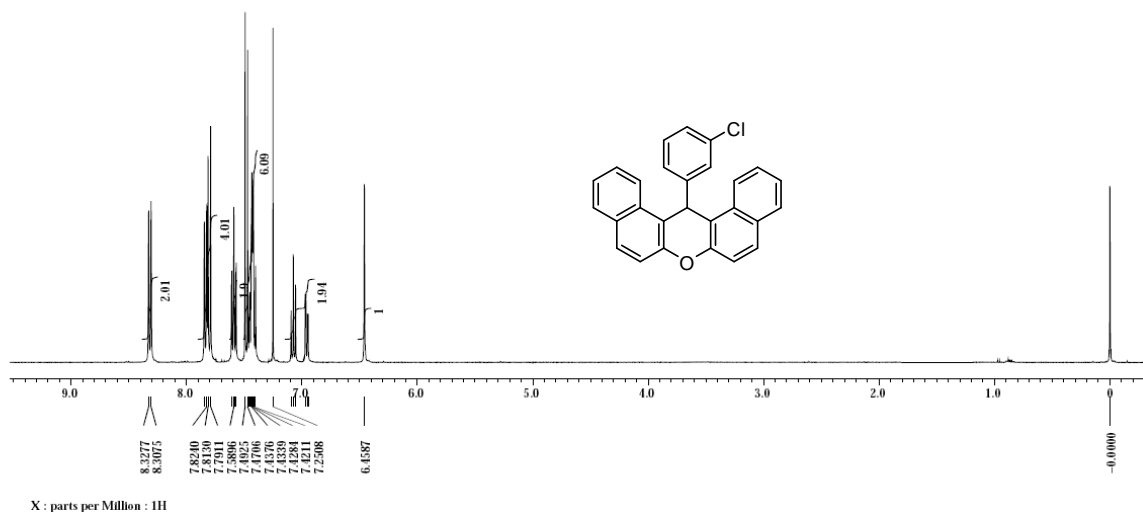

Fig 7.  $^1\text{H}$  NMR of 14-(3-chlorophenyl)-14*H*-dibenzo[*a,j*]xanthene (3d).

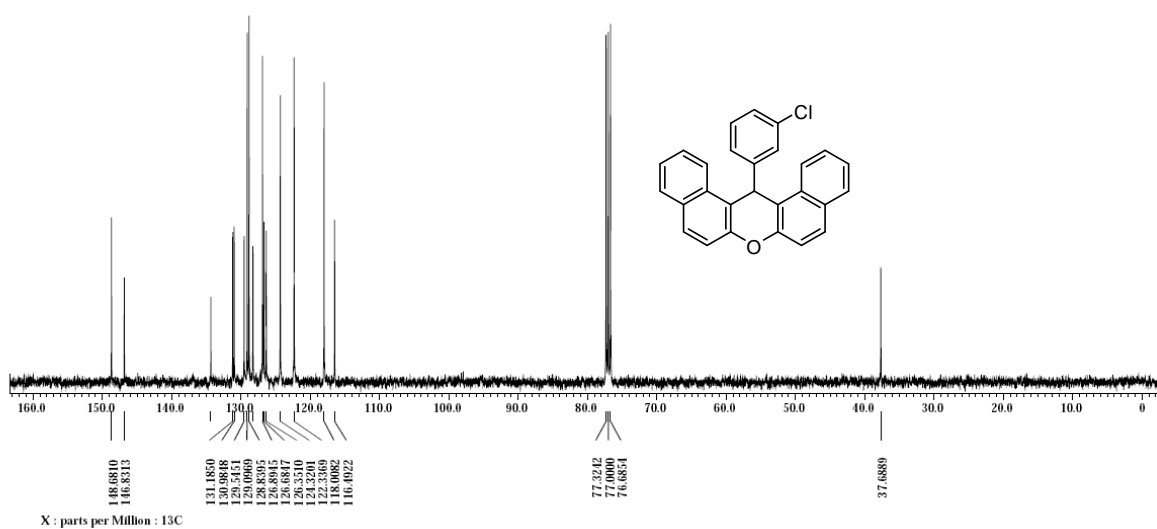

Fig 8.  $^{13}\text{C}$  NMR of 14-(3-chlorophenyl)-14*H*-dibenzo[*a,j*]xanthene (3d).

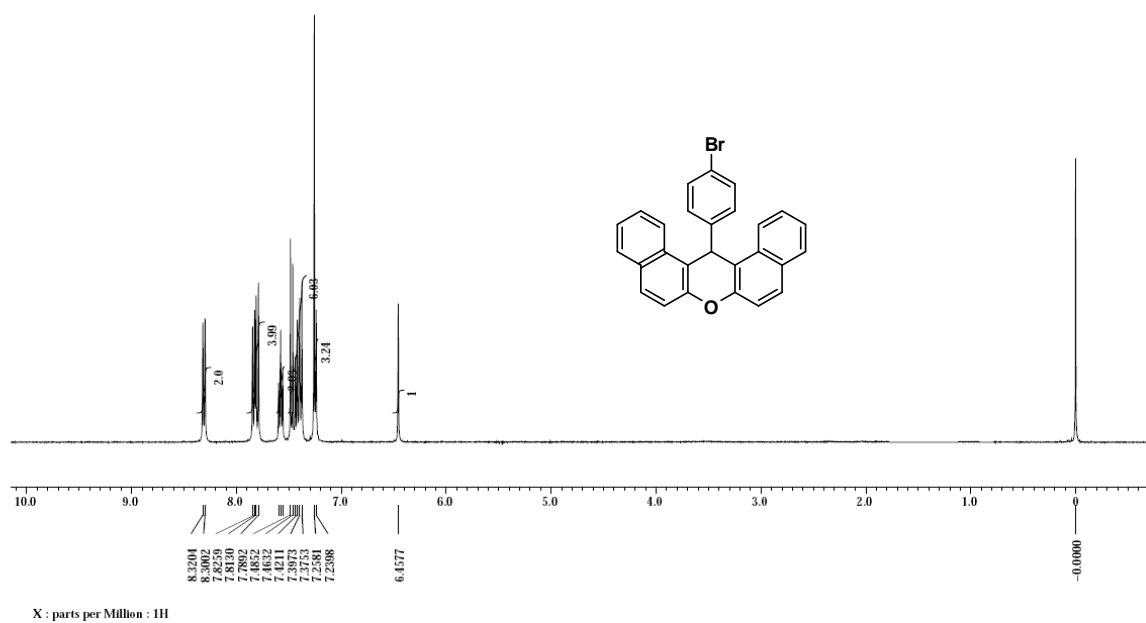

Fig 9.  $^1\text{H}$  NMR of 14-(4-bromophenyl)-14*H*-dibenzo[*a,j*]xanthene (3e).

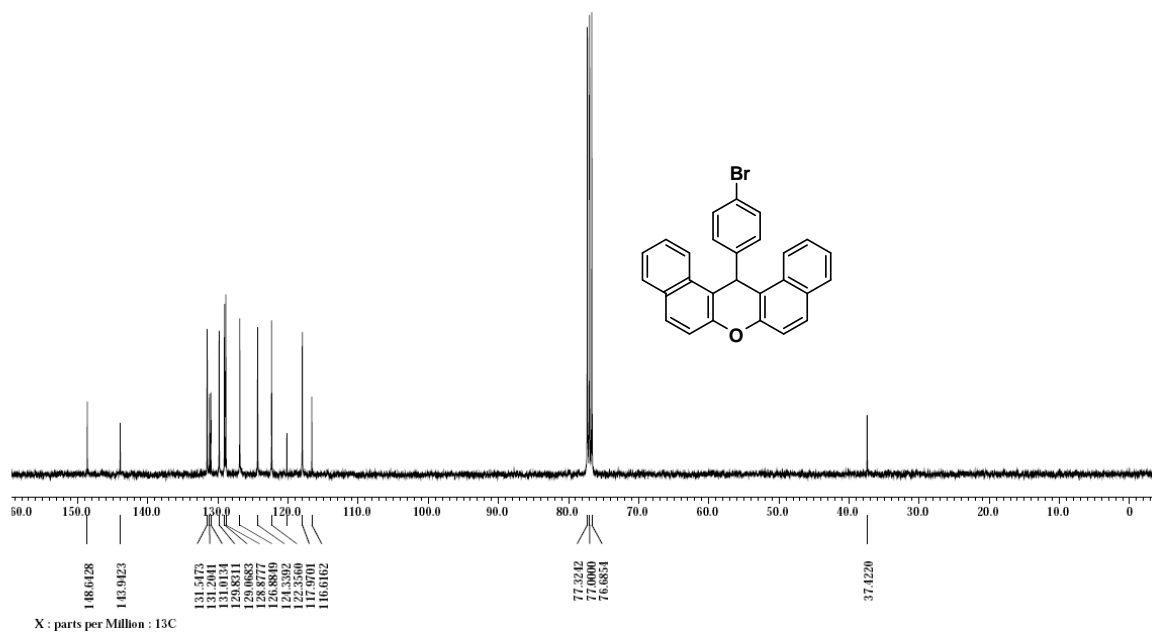

Fig 10.  $^{13}\text{C}$ -NMR of 14-(4-bromophenyl)-14*H*-dibenzo[*a,j*]xanthene (3e).

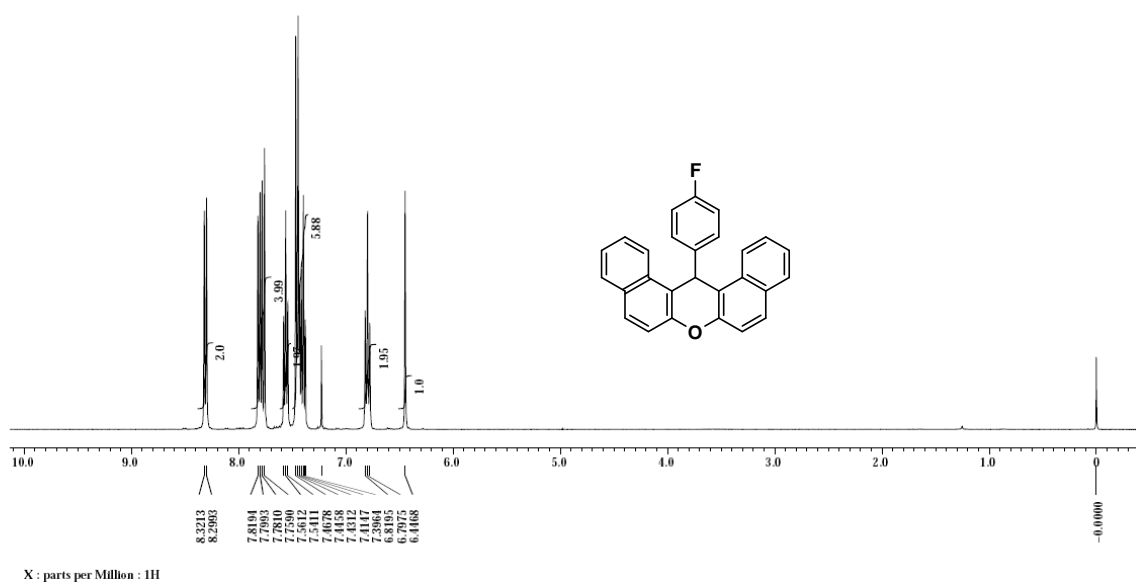

Fig 11. <sup>1</sup>H NMR of 14-(4-fluorophenyl)-14H-dibenzo[*a,j*]xanthene (3f).

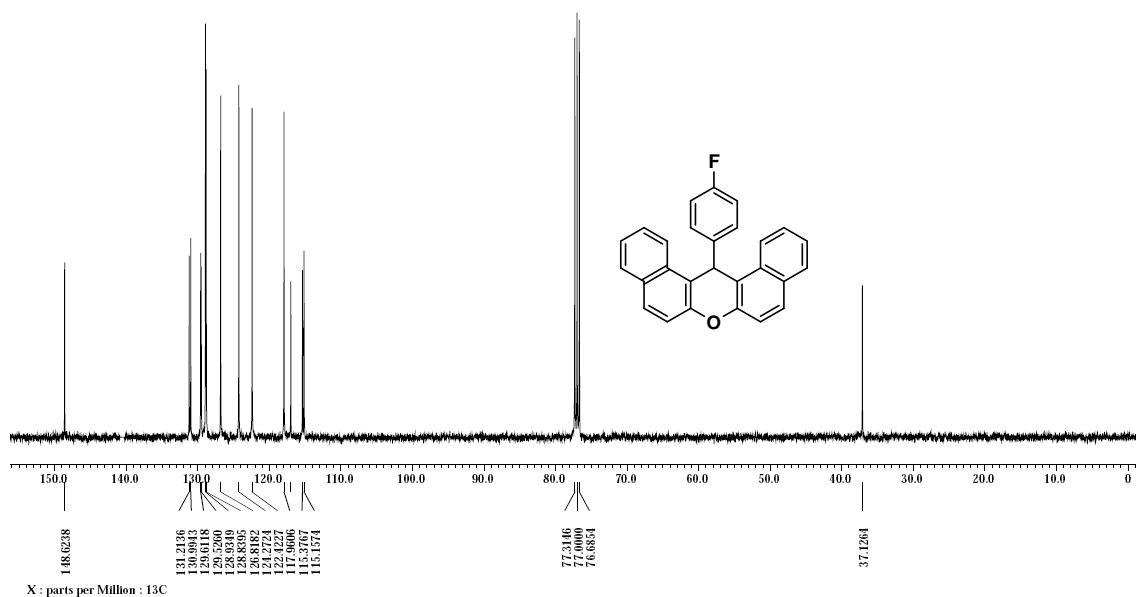

Fig 12. <sup>13</sup>C NMR of 14-(4-fluorophenyl)-14H-dibenzo[*a,j*]xanthene (3f).

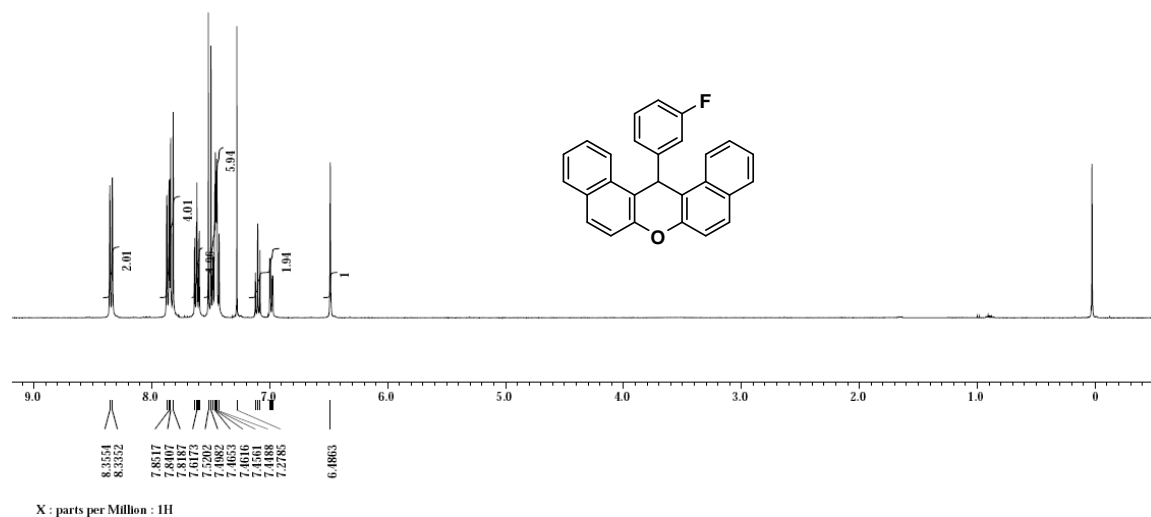

Fig 13. <sup>1</sup>H NMR of 14-(3-fluorophenyl)-14H-dibenzo[*a,j*]xanthene (3g).

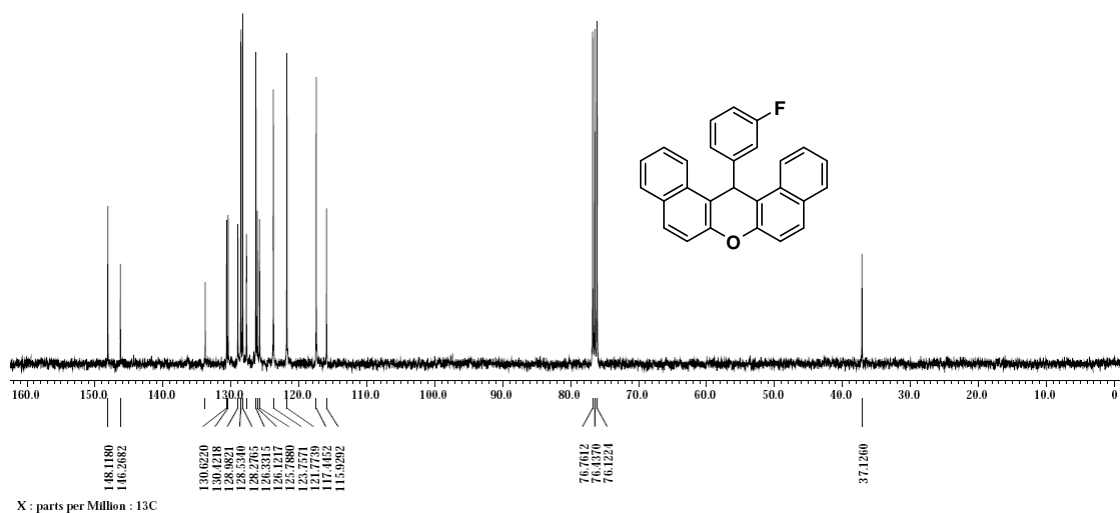

Fig 14. <sup>13</sup>C NMR of 14-(3-fluorophenyl)-14H-dibenzo[*a,j*]xanthene (3g).



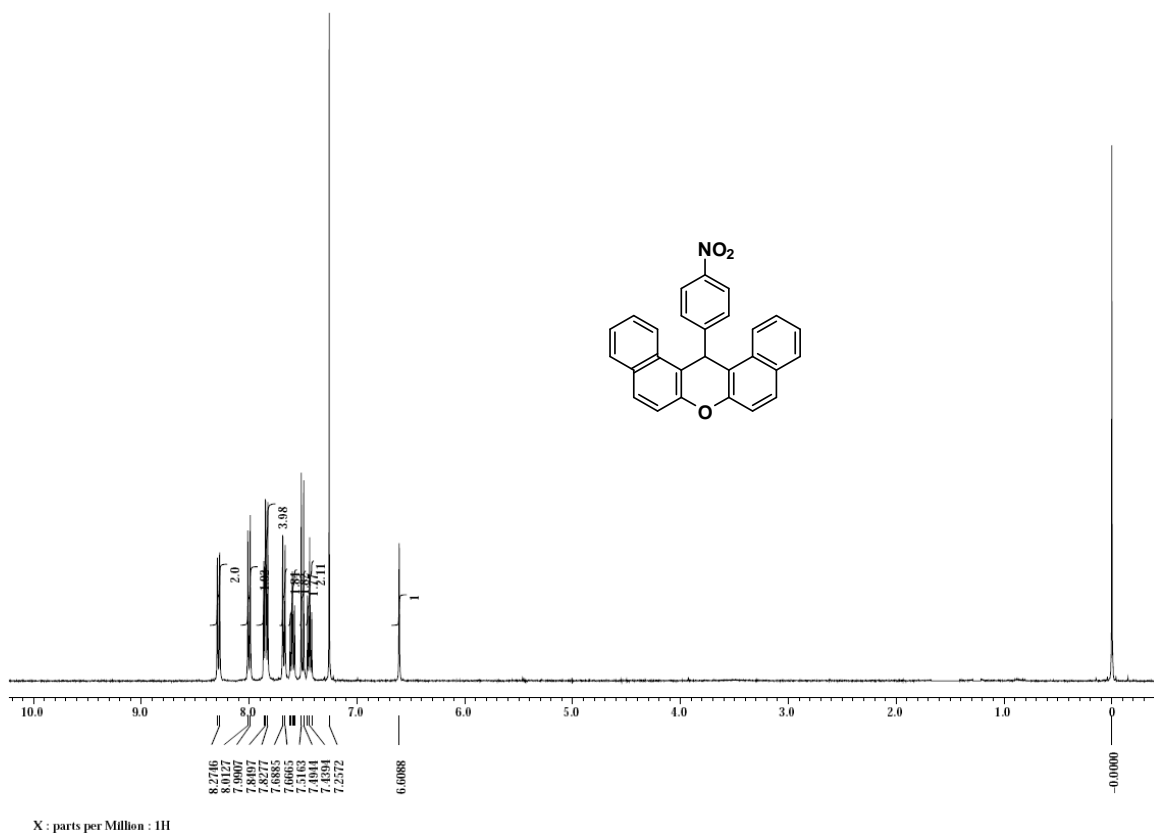

Fig 15.  $^1\text{H}$  NMR of 14-(4-nitrophenyl)-14*H*-dibenzo[*a,j*]xanthene (3h).

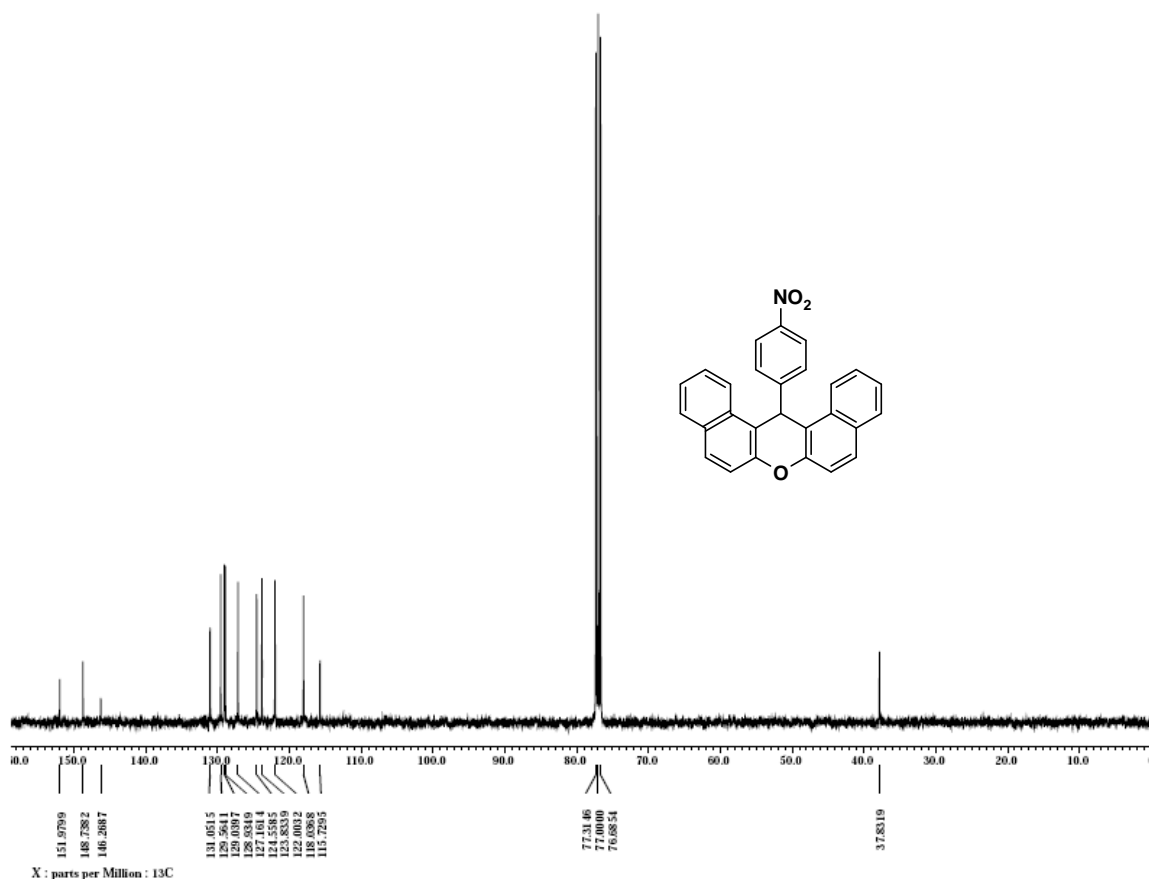

Fig 16.  $^{13}\text{C}$  NMR of 14-(4-nitrophenyl)-14*H*-dibenzo[*a,j*]xanthene (3h).

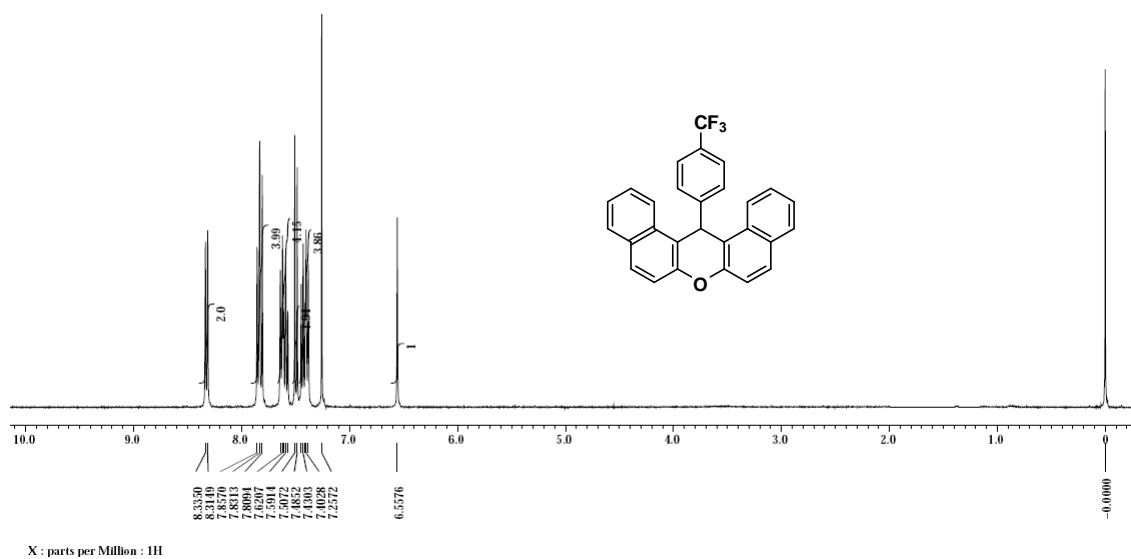

Fig 17.  $^1\text{H}$  NMR of 14-(4-(trifluoromethyl)phenyl)-14H-dibenzo[*a,j*]xanthene (3i).

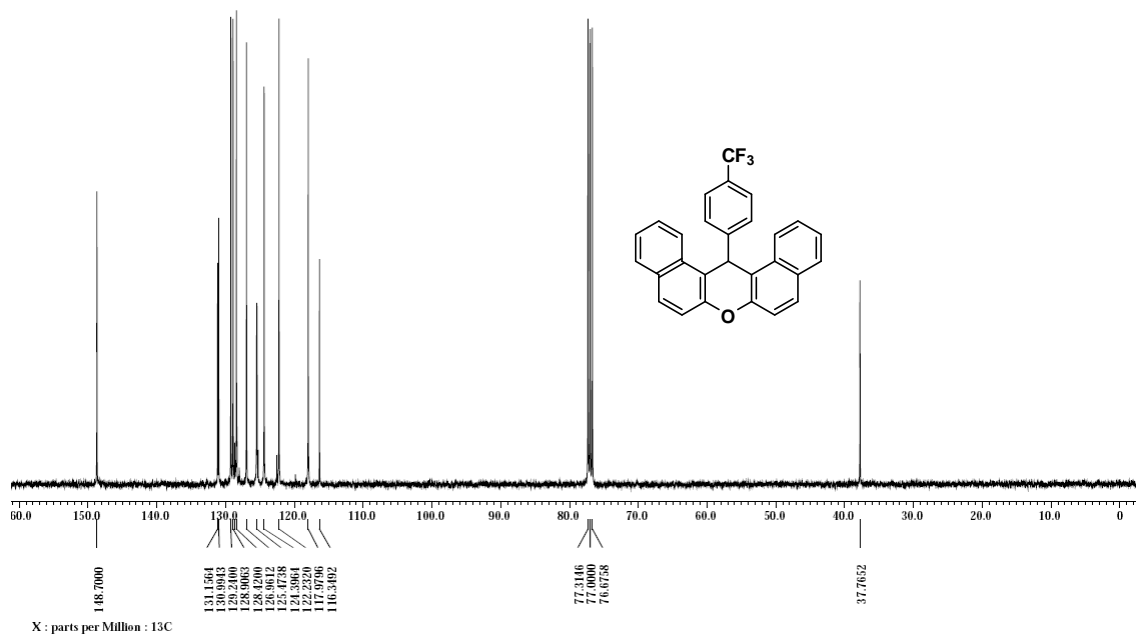

Fig 18.  $^{13}\text{C}$  NMR of 14-(4-(trifluoromethyl)phenyl)-14H-dibenzo[*a,j*]xanthene (3i).

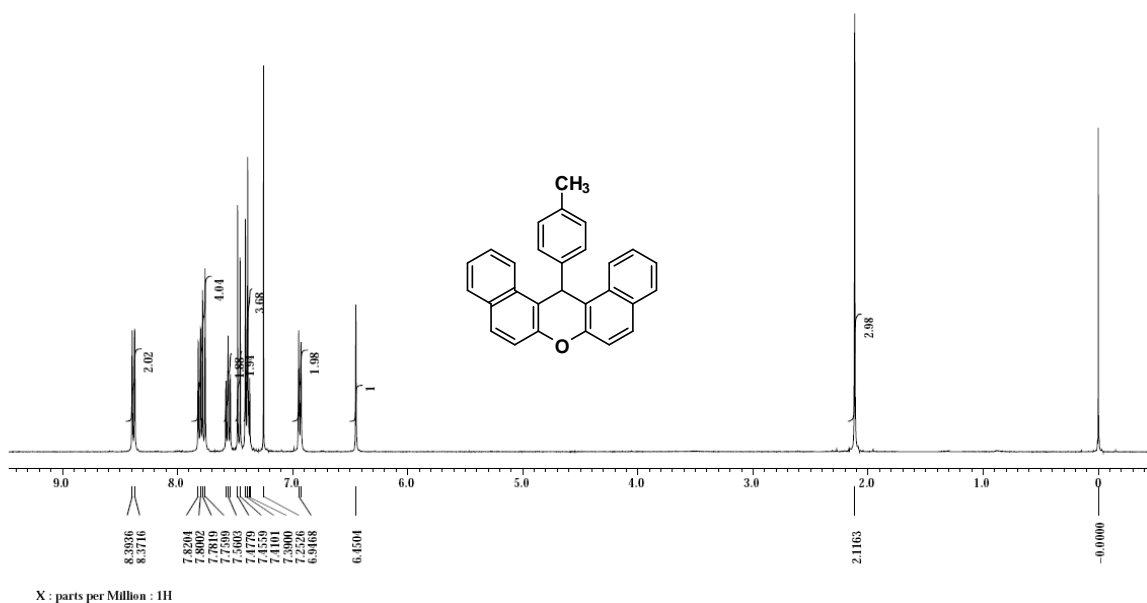

Fig 19. <sup>1</sup>H NMR of 14-*p*-tolyl-14*H*-dibenzo[*a,j*]xanthene (3j).

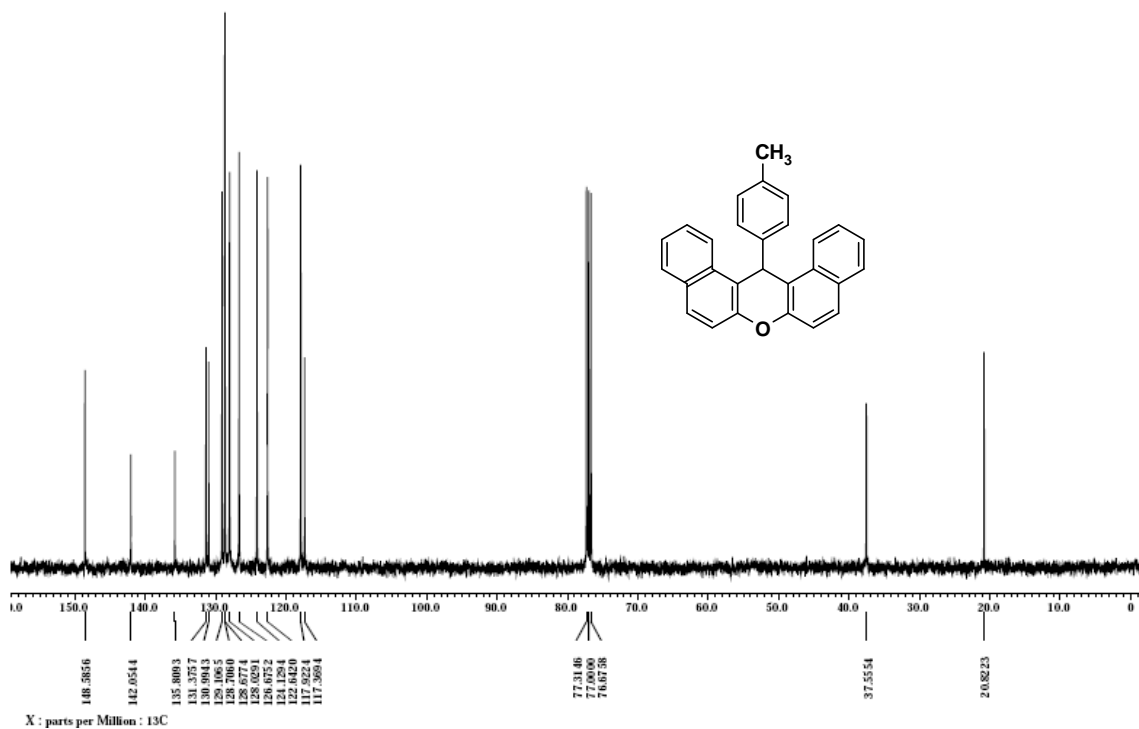

Fig 20. <sup>13</sup>C NMR of 14-*p*-tolyl-14*H*-dibenzo[*a,j*]xanthene (3j).

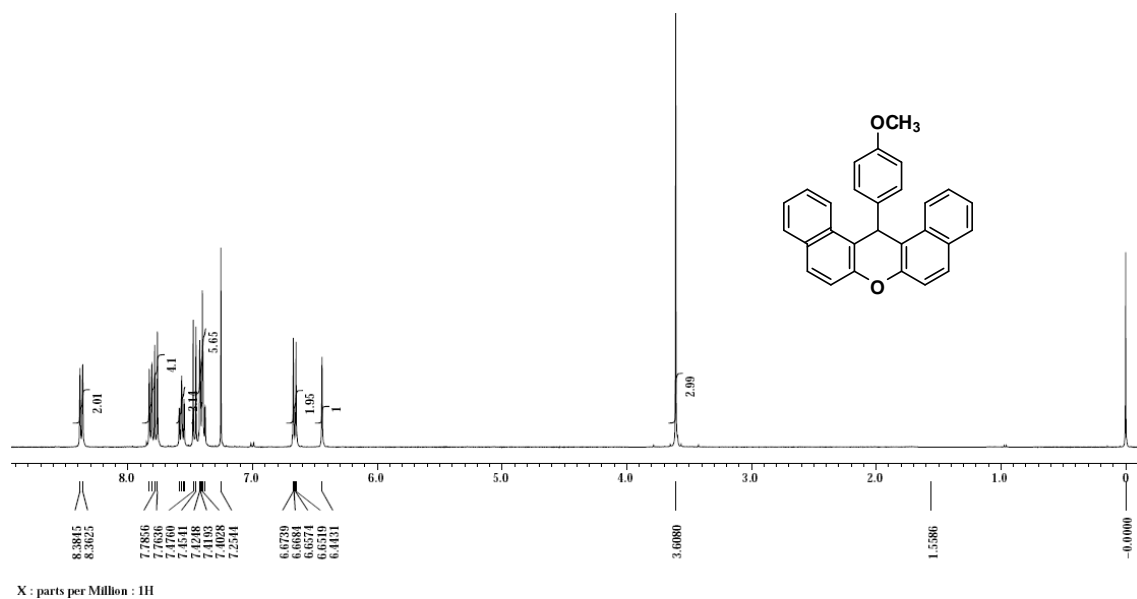

Fig 21.  $^1\text{H}$  NMR of 14-(4-methoxyphenyl)-14*H*-dibenzo[*a,j*]xanthene (3k).

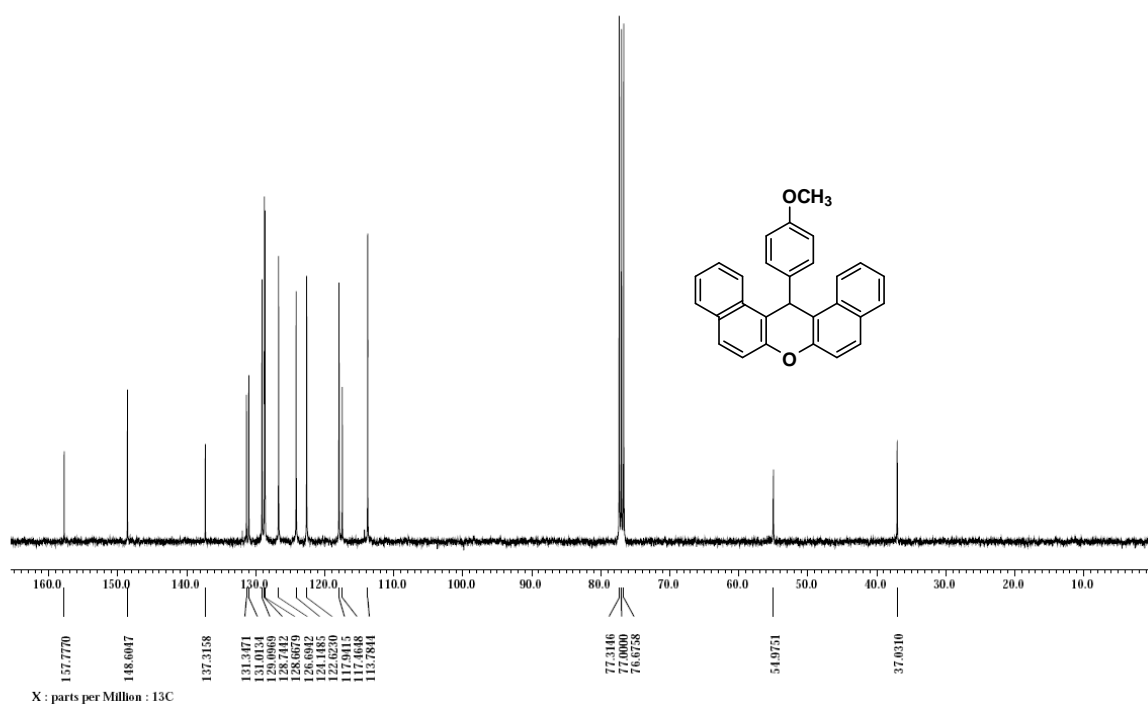

Fig 22.  $^{13}\text{C}$  NMR of 14-(4-methoxyphenyl)-14*H*-dibenzo[*a,j*]xanthene (3k).

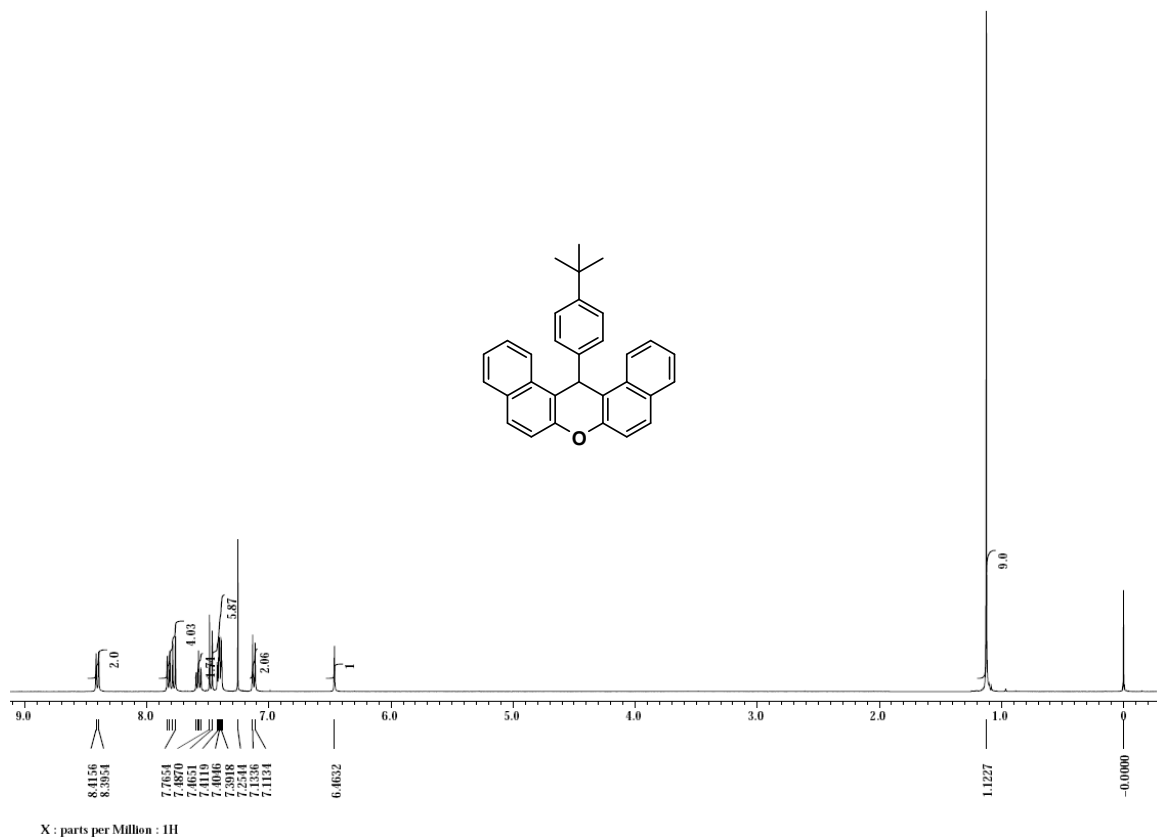

Fig 23.  $^1\text{H}$  NMR of 14-(4-*tert*-butylphenyl)-14*H*-dibenzo[*a,j*]xanthene (31).

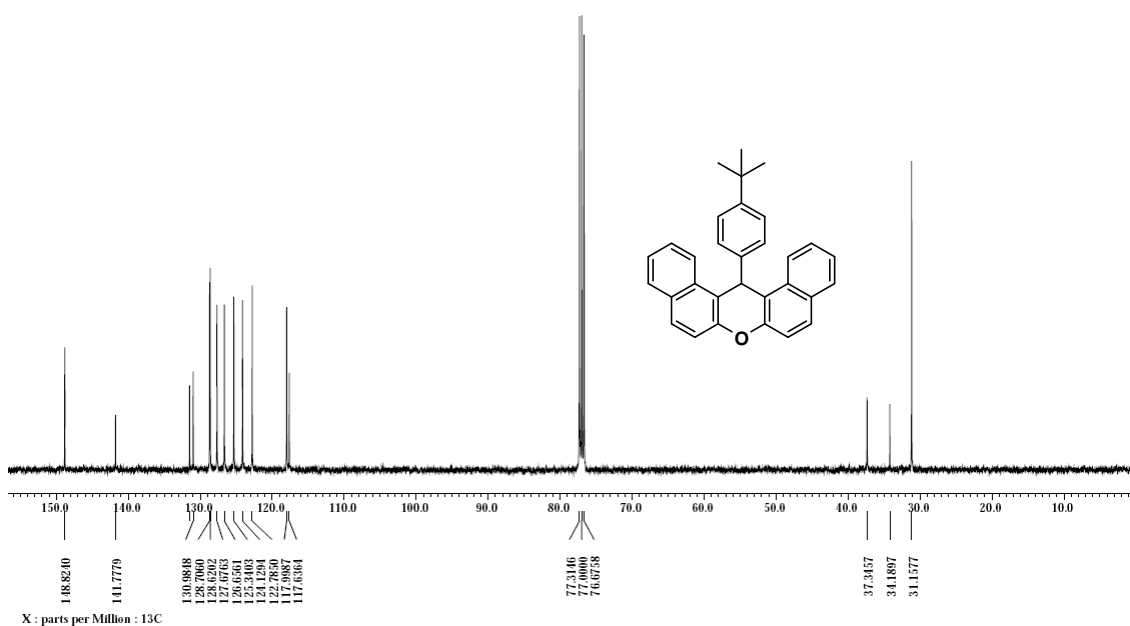

Fig 24.  $^{13}\text{C}$  NMR of 14-(4-*tert*-butylphenyl)-14*H*-dibenzo[*a,j*]xanthene (31).

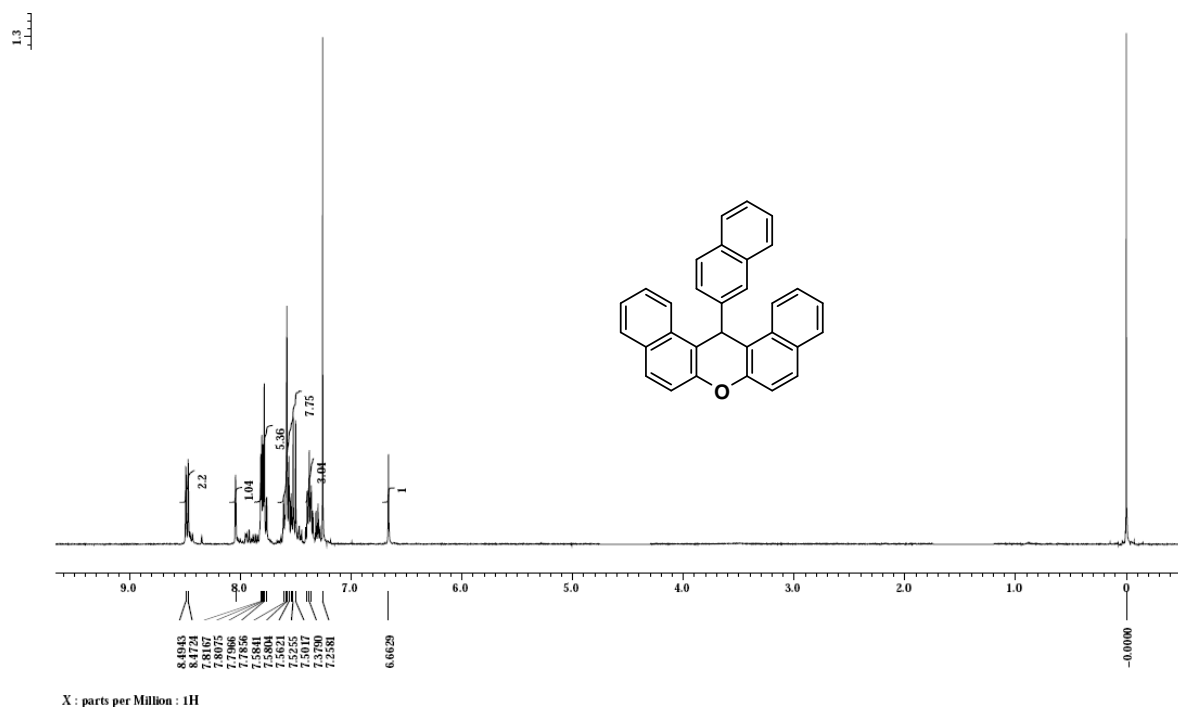

Fig 25.  $^1\text{H}$  NMR of 14-(naphthalen-2-yl)-14H-dibenzo[*a,j*]xanthene (3m).

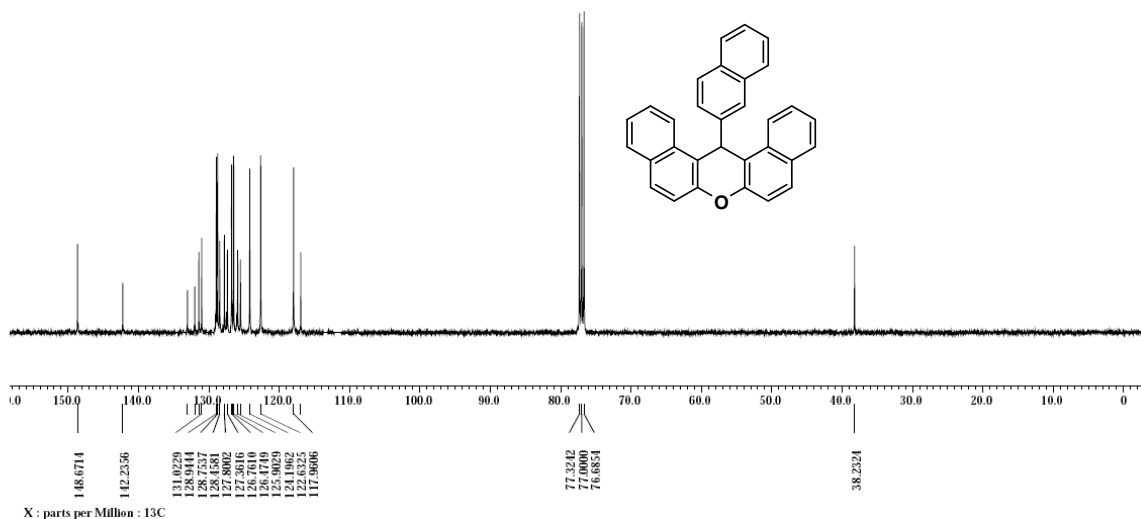

Fig 26.  $^{13}\text{C}$  NMR of 14-(naphthalen-2-yl)-14H-dibenzo[*a,j*]xanthene (3m).

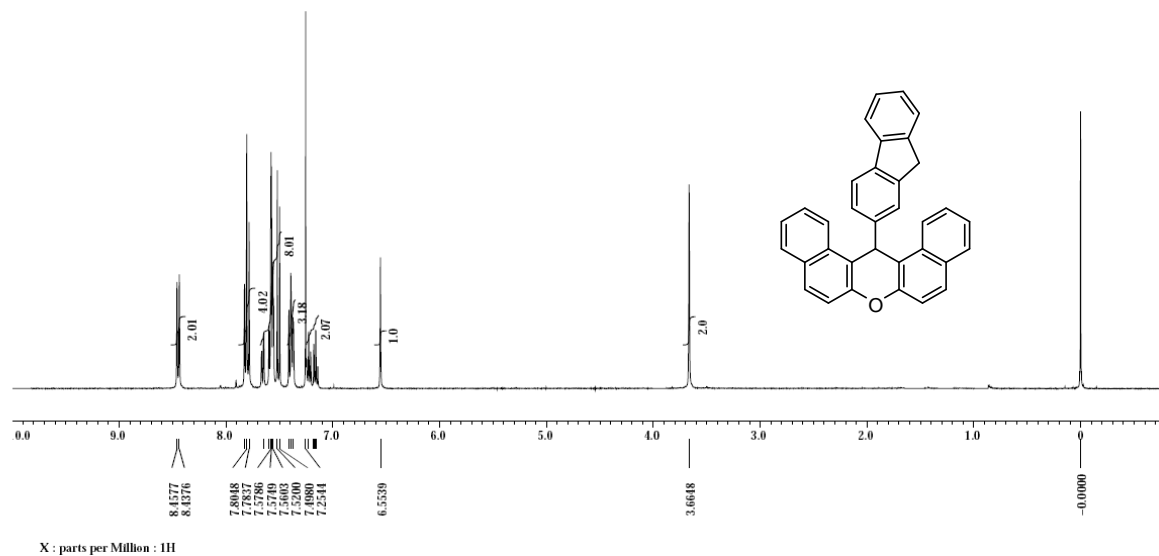

**Fig 27.** <sup>1</sup>H NMR of 14-(9H-fluoren-2-yl)-14H-dibenzo[*a,j*]xanthene (3n).

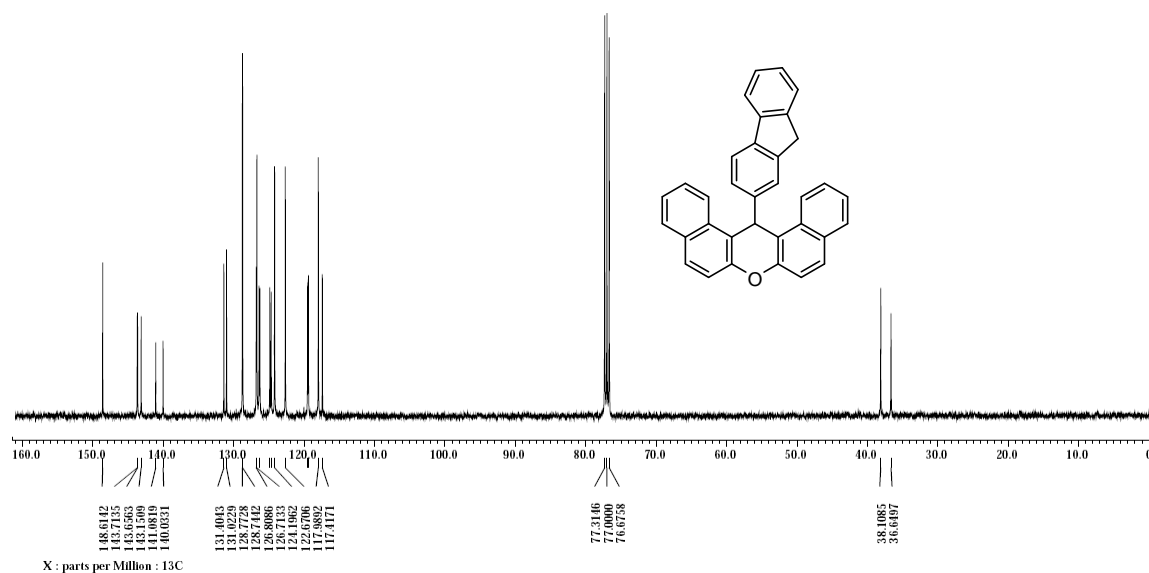

**Fig 28.** <sup>13</sup>C NMR of 14-(9H-fluoren-2-yl)-14H-dibenzo[*a,j*]xanthene (3n).
